# Supplementary material
Source: publisher figshare collection journal article supplement (https://karger.figshare.com/articles/dataset/_/5125213)
Supplement: Supplementary file 1 [file 1]

# Sexual dimorphism in the electrosensory-system

## Supplementary Material

S-Table 1. Total number of axons in the dorsal root of the anterior lateral line nerve (ALLN). DW: Disc width (cm).

| Specimen | Sex | DW   | No. of ALLN (dorsal root) axons |       |              |
|----------|-----|------|---------------------------------|-------|--------------|
|          |     |      | Left                            | Right | Total        |
| 1        | F   | 25.0 | 3220                            | 3868  | <b>7088</b>  |
| 2        | F   | 26.0 | 4841                            | 4885  | <b>9726</b>  |
| 3        | F   | 26.0 | 5492                            | 5402  | <b>10894</b> |
| 4        | F   | 28.5 | 7235                            | 6884  | <b>14119</b> |
| 5        | F   | 29.0 | 4652                            | 4836  | <b>9488</b>  |
| 6        | F   | 30.0 | 7771                            | 5612  | <b>13383</b> |
| 7        | M   | 25.5 | 2480                            | 2750  | <b>5230</b>  |
| 8        | M   | 27.0 | 3340                            | 3756  | <b>7096</b>  |
| 9        | M   | 27.0 | 3748                            | 3653  | <b>7401</b>  |
| 10       | M   | 32.0 | 3781                            | 3984  | <b>7765</b>  |

# Sexual dimorphism in the electrosensory-system

S-Table 2. Morphological characteristics of the ampullae of Lorenzini in *Taeniura lymma*. A: Number of pores associated with each sub-dermal cluster; B: Width of pores; C: Length of canals connecting pores and ampullae. H: Hyoid cluster; S: Superficial ophthalmic cluster; M: Mandibular cluster; V: Ventral; D: Dorsal; DW: Disc width (cm).

## A

| Specimen | Sex | DW          | Pore Abundance |            |            |             |        |             |             |
|----------|-----|-------------|----------------|------------|------------|-------------|--------|-------------|-------------|
|          |     |             | Ventral        |            |            |             | Dorsal |             | All         |
|          |     |             | S (S)          | H (H)      | M (M)      | V-Sub Total | H (H)  | D-Sub Total | Total       |
| 11       | F   | 28          | 350            | 608        | 118        | <b>1076</b> | 173    | <b>173</b>  | <b>1249</b> |
| 12       | M   | 28          | 363            | 577        | 120        | <b>1060</b> | 178    | <b>178</b>  | <b>1238</b> |
| 13       | F   | 29          | 352            | 593        | 123        | <b>1068</b> | 176    | <b>176</b>  | <b>1244</b> |
| 14       | M   | 32          | 374            | 586        | 129        | <b>1088</b> | 186    | <b>186</b>  | <b>1274</b> |
|          |     | <b>Mean</b> | <b>360</b>     | <b>769</b> | <b>123</b> | <b>1073</b> | 178    | <b>178</b>  | <b>1251</b> |

## B

| Specimen | Pore Width (mm)              |                                |                                |                              |
|----------|------------------------------|--------------------------------|--------------------------------|------------------------------|
|          | S (Mean ± SD)<br>(Min - Max) | V-H (Mean ± SD)<br>(Min - Max) | D-H (Mean ± SD)<br>(Min - Max) | M (Mean ± SD)<br>(Min - Max) |
| 11       | 0.33 ± 0.04<br>(0.28 - 0.37) | 0.31 ± 0.03<br>(0.27 - 0.36)   | 0.43 ± 0.11<br>(0.31 - 0.58)   | 0.19 ± 0.06<br>(0.10 - 0.23) |
| 12       | 0.33 ± 0.04<br>(0.27 - 0.37) | 0.30 ± 0.03<br>(0.26 - 0.34)   | 0.41 ± 0.10<br>(0.29 - 0.55)   | 0.18 ± 0.06<br>(0.09 - 0.23) |
| 13       | 0.32 ± 0.04<br>(0.26 - 0.39) | 0.32 ± 0.03<br>(0.26 - 0.37)   | 0.46 ± 0.11<br>(0.32 - 0.60)   | 0.20 ± 0.04<br>(0.13 - 0.24) |
| 14       | 0.36 ± 0.04<br>(0.30 - 0.41) | 0.32 ± 0.04<br>(0.27 - 0.39)   | 0.48 ± 0.12<br>(0.34 - 0.63)   | 0.22 ± 0.04<br>(0.15 - 0.26) |

# Sexual dimorphism in the electrosensory-system

C

| Specimen | Canal Length (mm)               |                                  |                                   |                              |
|----------|---------------------------------|----------------------------------|-----------------------------------|------------------------------|
|          | S (Mean ± SD)                   | V-H (Mean ± SD)                  | D-H (Mean ± SD)                   | M (Mean ± SD)                |
|          | (Min - Max)                     | (Min - Max)                      | (Min - Max)                       | (Min - Max)                  |
| 11       | 22.15 ± 21.23<br>(3.31 - 58.24) | 29.40 ± 45.70<br>(2.80 - 154.10) | 59.10 ± 61.80<br>(19.20 - 181.10) | 7.02 ± 1.33<br>(4.53 - 8.31) |
| 12       | 21.74 ± 20.78<br>(3.50 - 57.07) | 29.10 ± 45.40<br>(2.70 - 153.00) | 57.10 ± 56.70<br>(18.80 - 177.40) | 6.95 ± 1.30<br>(4.50 - 8.14) |
| 13       | 23.01 ± 22.03<br>(3.53 - 60.45) | 30.60 ± 47.40<br>(2.90 - 159.90) | 71.90 ± 72.30<br>(19.90 - 188.00) | 6.94 ± 1.55<br>(4.71 - 8.62) |
| 14       | 25.86 ± 22.53<br>(3.54 - 62.31) | 31.50 ± 48.90<br>(3.00 - 164.90) | 63.30 ± 66.10<br>(20.60 - 193.70) | 7.53 ± 1.42<br>(4.85 - 8.89) |
